# Supplementary material for: Proteomic analysis of insulin secretory granules in INS-1 cells by protein correlation profiling
Source: PubMed Central journal article supplement (PMC6276070; doi:10.1007/s41048-018-0061-3), 2018-08-29
Supplement: 41048_2018_61_MOESM1_ESM.pdf [file 41048_2018_61_MOESM1_ESM.pdf]

## Supplementary materials

**Table S1** The list of ISG potential candidates that were identified using protein correlation profiling by calculating the Euclidean distance between them and ISGs markers (Chga, Cpe, Hid1, Ins1, Pcsk1, Pcsk2, Ptpn2, Scg5, Sytl4)

| ISGs Makers | Target  | Uniprot                                                              | Euclidean distance |
|-------------|---------|----------------------------------------------------------------------|--------------------|
| Chga        | Galnt2  | tr A0A0G2JU25 A0A0G2JU25_RAT;tr D3ZFD2 D3ZFD2_RAT                    | 0.0569184          |
| Chga        | Glg1    | sp Q62638 GSLG1_RAT;tr G3V8G5 G3V8G5_RAT                             | 0.0698319          |
| Chga        | Zfp11   | tr M0RCA3 M0RCA3_RAT                                                 | 0.088497           |
| Chga        | Ptpn2   | sp Q63475 PTPR2_RAT                                                  | 0.105461           |
| Chga        | Qsox2   | tr D3ZP13 D3ZP13_RAT                                                 | 0.117665           |
| Chga        | Fn1     | sp P04937 FINC_RAT;tr A0A096P6L8 A0A096P6L8_RAT;tr F1LST1 F1LST1_RAT | 0.134109           |
| Chga        | Hapln4  | tr D3Z9H2 D3Z9H2_RAT                                                 | 0.141703           |
| Chga        | Glt8d1  | tr Q7TP03 Q7TP03_RAT;sp Q6AYF6 GL8D1_RAT                             | 0.150501           |
| Chga        | Gosr1   | sp Q62931 GOSR1_RAT                                                  | 0.156834           |
| Chga        | Gcg     | tr G3V6P5 G3V6P5_RAT;sp P06883 GLUC_RAT                              | 0.190073           |
| Chga        | Atp6ap1 | sp O54715 VAS1_RAT;tr Q6IRF8 Q6IRF8_RAT                              | 0.219245           |
| Chga        | Cpn1    | sp Q9EQV8 CBPN_RAT                                                   | 0.225164           |
| Chga        | Pcsk2   | sp P28841 NEC2_RAT                                                   | 0.235778           |
| Chga        | Stc1    | sp P97574 STC1_RAT                                                   | 0.255162           |
| Chga        | Tmed4   | tr G3V6N2 G3V6N2_RAT;tr A0A0G2K8M5 A0A0G2K8M5_RAT                    | 0.260677           |
| Chga        | Scfd1   | sp Q62991 SCFD1_RAT                                                  | 0.272812           |
| Chga        | Plod3   | sp Q5U367 PLOD3_RAT                                                  | 0.277956           |
| Chga        | Tmed9   | sp Q5I0E7 TMED9_RAT                                                  | 0.281133           |
| Chga        | Tmed10  | sp Q63584 TMEDA_RAT                                                  | 0.28352            |
| Chga        | Cpe     | tr D4A8X4 D4A8X4_RAT;sp P15087 CBPE_RAT                              | 0.291278           |
| Chga        | Ins2    | sp P01323 INS2_RAT                                                   | 0.29236            |
| Chga        | Fam3a   | tr B5DFJ2 B5DFJ2_RAT                                                 | 0.306231           |
| Cpe         | Stc1    | sp P97574 STC1_RAT                                                   | 0.0569577          |
| Cpe         | Enpp2   | sp Q64610 ENPP2_RAT;tr F1LSF4 F1LSF4_RAT;tr D3ZES5 D3ZES5_RAT        | 0.0629894          |
| Cpe         | Arcn1   | sp Q66H80 COPD_RAT                                                   | 0.0717812          |
| Cpe         | Pcsk2   | sp P28841 NEC2_RAT                                                   | 0.0744404          |
| Cpe         | Impad1  | tr Q7TPJ5 Q7TPJ5_RAT;sp D4AD37 IMPA3_RAT                             | 0.123147           |
| Cpe         | Copb1   | sp P23514 COPB_RAT                                                   | 0.12432            |
| Cpe         | Gc      | tr Q68FY4 Q68FY4_RAT;sp P04276 VTDB_RAT                              | 0.128805           |
| Cpe         | Pcsk1   | tr A0A0G2JX54 A0A0G2JX54_RAT;sp P28840 NEC1_RAT                      | 0.142568           |
| Cpe         | Ins1    | sp P01322 INS1_RAT                                                   | 0.152098           |
| Cpe         | Sytl4   | sp Q8VHQ7 SYTL4_RAT                                                  | 0.164674           |
| Cpe         | Clint1  | tr A0A0G2JW94 A0A0G2JW94_RAT;tr Q6DGF2 Q6DGF2_RAT                    | 0.166501           |
| Cpe         | Gosr1   | sp Q62931 GOSR1_RAT                                                  | 0.187481           |

|      |         |                                                                                                           |          |
|------|---------|-----------------------------------------------------------------------------------------------------------|----------|
| Cpe  | Copg1   | sp Q4AEF8 COPG1_RAT;tr A0A0G2K1F3 A0A0G2K1F3_RAT                                                          | 0.19069  |
| Cpe  | Tm9sf3  | tr D3ZUD8 D3ZUD8_RAT                                                                                      | 0.190761 |
| Cpe  | Qsox2   | tr D3ZP13 D3ZP13_RAT                                                                                      | 0.193194 |
| Cpe  | Ap2a1   | tr D3ZUY8 D3ZUY8_RAT                                                                                      | 0.206744 |
| Cpe  | Rab37   | tr D4A0G7 D4A0G7_RAT                                                                                      | 0.208311 |
| Cpe  | Ptpn2   | sp Q63475 PTPR2_RAT                                                                                       | 0.213242 |
| Cpe  | Plod3   | sp Q5U367 PLOD3_RAT                                                                                       | 0.220945 |
| Cpe  | Tmed4   | tr G3V6N2 G3V6N2_RAT;tr A0A0G2K8M5 A0A0G2K8M5_RAT                                                         | 0.221403 |
| Cpe  | Scg5    | tr G3V714 G3V714_RAT;sp P27682 7B2_RAT                                                                    | 0.221507 |
| Hid1 | Tmem30a | tr A0A0G2JXG3 A0A0G2JXG3_RAT;sp Q6AY41 CC50A_RAT                                                          | 0.132401 |
| Hid1 | Ncstn   | tr B3DM90 B3DM90_RAT;sp Q8CGU6 NICA_RAT                                                                   | 0.140366 |
| Hid1 | Sec24d  | tr G3V9S9 G3V9S9_RAT                                                                                      | 0.143599 |
| Hid1 | Napa    | sp P54921 SNAA_RAT                                                                                        | 0.149335 |
| Hid1 | Stx12   | tr A0A0G2JVB6 A0A0G2JVB6_RAT;sp G3V7P1 STX12_RAT;tr A0A0G2K4U8 A0A0G2K4U8_RAT                             | 0.167116 |
| Hid1 | Lamtor3 | sp Q5U204 LTOR3_RAT                                                                                       | 0.176782 |
| Hid1 | Cnp     | sp P13233 CN37_RAT                                                                                        | 0.181571 |
| Hid1 | Arfrp1  | sp Q63055 ARFRP_RAT                                                                                       | 0.182491 |
| Hid1 | Stampb  | sp Q8R424 STABP_RAT                                                                                       | 0.188186 |
| Hid1 | Lamp1   | sp P14562 LAMP1_RAT                                                                                       | 0.193812 |
| Hid1 | Rab11a  | sp P62494 RB11A_RAT;tr A0A0G2JZR4 A0A0G2JZR4_RAT;sp O35509 RB11B_RAT                                      | 0.2052   |
| Hid1 | Lnpep   | sp P97629 LCAP_RAT;tr A0A0H2UHK5 A0A0H2UHK5_RAT;tr A0A0G2JUW8 A0A0G2JUW8_RAT;tr A0A0G2JYN3 A0A0G2JYN3_RAT | 0.206915 |
| Ins1 | Tmed10  | sp Q63584 TMEDA_RAT                                                                                       | 0.128213 |
| Ins1 | Rab37   | tr D4A0G7 D4A0G7_RAT                                                                                      | 0.134912 |
| Ins1 | Tmed7   | sp D3ZTX0 TMED7_RAT                                                                                       | 0.15524  |
| Ins1 | Scfd1   | sp Q62991 SCFD1_RAT                                                                                       | 0.162747 |
| Ins1 | Arcn1   | sp Q66H80 COPD_RAT                                                                                        | 0.162767 |
| Ins1 | Casc4   | tr D3ZW58 D3ZW58_RAT                                                                                      | 0.187641 |
| Ins1 | Rps27   | sp Q71TY3 RS27_RAT;tr M0RA26 M0RA26_RAT                                                                   | 0.189074 |
| Ins1 | Tmem63b | tr D4A105 D4A105_RAT                                                                                      | 0.193845 |
| Ins1 | Tmed1   | sp Q5BK85 TMED1_RAT                                                                                       | 0.195676 |
| Ins1 | Enpp2   | sp Q64610 ENPP2_RAT;tr F1LSF4 F1LSF4_RAT;tr D3ZES5 D3ZES5_RAT                                             | 0.201641 |
| Ins1 | Vps45   | sp O08700 VPS45_RAT                                                                                       | 0.210855 |
| Ins1 | Sytl4   | sp Q8VHQ7 SYTL4_RAT                                                                                       | 0.216534 |
| Ins1 | Hs2st1  | tr G3V7N0 G3V7N0_RAT                                                                                      | 0.218947 |
| Ins1 | Tm9sf3  | tr D3ZUD8 D3ZUD8_RAT                                                                                      | 0.219586 |
| Ins1 | Galnt14 | tr Q6AYA4 Q6AYA4_RAT                                                                                      | 0.223466 |
| Ins1 | B3gat3  | tr B2GV35 B2GV35_RAT                                                                                      | 0.227941 |
| Ins1 | Stx5    | sp Q08851 STX5_RAT                                                                                        | 0.228368 |
| Ins1 | B4galt3 | sp Q6P768 B4GT3_RAT                                                                                       | 0.229702 |
| Ins1 | Gc      | tr Q68FY4 Q68FY4_RAT;sp P04276 VTDB_RAT                                                                   | 0.229845 |

|        |        |                                                               |           |
|--------|--------|---------------------------------------------------------------|-----------|
| Ins1   | Erp44  | tr Q5VLR5 Q5VLR5_RAT                                          | 0.237435  |
| Pcsk1  | Clint1 | tr A0A0G2JW94 A0A0G2JW94_RAT;tr Q6DGF2 Q6DGF2_RAT             | 0.105733  |
| Pcsk1  | Gc     | tr Q68FY4 Q68FY4_RAT;sp P04276 VTDB_RAT                       | 0.116375  |
| Pcsk1  | Impad1 | tr Q7TPJ5 Q7TPJ5_RAT;sp D4AD37 IMPA3_RAT                      | 0.129362  |
| Pcsk1  | Enpp2  | sp Q64610 ENPP2_RAT;tr F1LSF4 F1LSF4_RAT;tr D3ZES5 D3ZES5_RAT | 0.138934  |
| Pcsk1  | Rab37  | tr D4A0G7 D4A0G7_RAT                                          | 0.14044   |
| Pcsk1  | Cpe    | tr D4A8X4 D4A8X4_RAT;sp P15087 CBPE_RAT                       | 0.142568  |
| Pcsk1  | Stc1   | sp P97574 STC1_RAT                                            | 0.16125   |
| Pcsk1  | Tmed10 | sp Q63584 TMEDA_RAT                                           | 0.170855  |
| Pcsk1  | Pcsk2  | sp P28841 NEC2_RAT                                            | 0.171285  |
| Pcsk1  | Tmed4  | tr G3V6N2 G3V6N2_RAT;tr A0A0G2K8M5 A0A0G2K8M5_RAT             | 0.17687   |
| Pcsk1  | Tmed1  | sp Q5BK85 TMED1_RAT                                           | 0.178405  |
| Pcsk1  | Gosr1  | sp Q62931 GOSR1_RAT                                           | 0.18601   |
| Pcsk1  | Tmed7  | sp D3ZTX0 TMED7_RAT                                           | 0.190257  |
| Pcsk1  | Arcn1  | sp Q66H80 COPD_RAT                                            | 0.191491  |
| Pcsk1  | Qsox2  | tr D3ZP13 D3ZP13_RAT                                          | 0.207429  |
| Pcsk1  | Tll1   | tr D3Z8U5 D3Z8U5_RAT                                          | 0.211053  |
| Pcsk2  | Cpe    | tr D4A8X4 D4A8X4_RAT;sp P15087 CBPE_RAT                       | 0.0744404 |
| Pcsk2  | Stc1   | sp P97574 STC1_RAT                                            | 0.0855415 |
| Pcsk2  | Arcn1  | sp Q66H80 COPD_RAT                                            | 0.104144  |
| Pcsk2  | Ins1   | sp P01322 INS1_RAT                                            | 0.120378  |
| Pcsk2  | Enpp2  | sp Q64610 ENPP2_RAT;tr F1LSF4 F1LSF4_RAT;tr D3ZES5 D3ZES5_RAT | 0.13147   |
| Pcsk2  | Gosr1  | sp Q62931 GOSR1_RAT                                           | 0.135317  |
| Pcsk2  | Qsox2  | tr D3ZP13 D3ZP13_RAT                                          | 0.146571  |
| Pcsk2  | Ptprn2 | sp Q63475 PTPR2_RAT                                           | 0.15023   |
| Pcsk2  | Plod3  | sp Q5U367 PLOD3_RAT                                           | 0.159383  |
| Pcsk2  | Scg5   | tr G3V714 G3V714_RAT;sp P27682 7B2_RAT                        | 0.16188   |
| Pcsk2  | Pcsk1  | tr A0A0G2JX54 A0A0G2JX54_RAT;sp P28840 NEC1_RAT               | 0.171285  |
| Pcsk2  | Impad1 | tr Q7TPJ5 Q7TPJ5_RAT;sp D4AD37 IMPA3_RAT                      | 0.177781  |
| Pcsk2  | Glb112 | tr D3ZHQ5 D3ZHQ5_RAT                                          | 0.178107  |
| Pcsk2  | Tmed4  | tr G3V6N2 G3V6N2_RAT;tr A0A0G2K8M5 A0A0G2K8M5_RAT             | 0.183778  |
| Pcsk2  | Gc     | tr Q68FY4 Q68FY4_RAT;sp P04276 VTDB_RAT                       | 0.195167  |
| Pcsk2  | Scfd1  | sp Q62991 SCFD1_RAT                                           | 0.198284  |
| Pcsk2  | Tmed10 | sp Q63584 TMEDA_RAT                                           | 0.205116  |
| Pcsk2  | Sytl4  | sp Q8VHQ7 SYTL4_RAT                                           | 0.208412  |
| Pcsk2  | Glg1   | sp Q62638 GSLG1_RAT;tr G3V8G5 G3V8G5_RAT                      | 0.212342  |
| Pcsk2  | Rab37  | tr D4A0G7 D4A0G7_RAT                                          | 0.212579  |
| Pcsk2  | Clint1 | tr A0A0G2JW94 A0A0G2JW94_RAT;tr Q6DGF2 Q6DGF2_RAT             | 0.215882  |
| Pcsk2  | Tm9sf3 | tr D3ZUD8 D3ZUD8_RAT                                          | 0.217874  |
| Pcsk2  | Tmed7  | sp D3ZTX0 TMED7_RAT                                           | 0.223314  |
| Pcsk2  | Tmed9  | sp Q5I0E7 TMED9_RAT                                           | 0.224433  |
| Ptprn2 | Qsox2  | tr D3ZP13 D3ZP13_RAT                                          | 0.0587142 |

|        |         |                                                                      |           |
|--------|---------|----------------------------------------------------------------------|-----------|
| Ptprn2 | Gosr1   | sp Q62931 GOSR1_RAT                                                  | 0.0628878 |
| Ptprn2 | Zfp11   | tr M0RCA3 M0RCA3_RAT                                                 | 0.0634938 |
| Ptprn2 | Man1b1  | sp B2GUY0 MA1B1_RAT                                                  | 0.0850438 |
| Ptprn2 | Galnt2  | tr A0A0G2JU25 A0A0G2JU25_RAT;tr D3ZFD2 D3ZFD2_RAT                    | 0.105425  |
| Ptprn2 | Chga    | sp P10354 CMGA_RAT;tr Q5PPG5 Q5PPG5_RAT                              | 0.105461  |
| Ptprn2 | Gcg     | tr G3V6P5 G3V6P5_RAT;sp P06883 GLUC_RAT                              | 0.119256  |
| Ptprn2 | Glt8d1  | tr Q7TP03 Q7TP03_RAT;sp Q6AYF6 GL8D1_RAT                             | 0.121161  |
| Ptprn2 | Hapln4  | tr D3Z9H2 D3Z9H2_RAT                                                 | 0.127466  |
| Ptprn2 | Pcsk2   | sp P28841 NEC2_RAT                                                   | 0.15023   |
| Ptprn2 | Cpn1    | sp Q9EQV8 CBPN_RAT                                                   | 0.161079  |
| Ptprn2 | Tmed4   | tr G3V6N2 G3V6N2_RAT;tr A0A0G2K8M5 A0A0G2K8M5_RAT                    | 0.167965  |
| Ptprn2 | Fn1     | sp P04937 FINC_RAT;tr A0A096P6L8 A0A096P6L8_RAT;tr F1LST1 F1LST1_RAT | 0.170587  |
| Ptprn2 | Stc1    | sp P97574 STC1_RAT                                                   | 0.193266  |
| Ptprn2 | Tmed10  | sp Q63584 TMEDA_RAT                                                  | 0.195489  |
| Ptprn2 | Plod3   | sp Q5U367 PLOD3_RAT                                                  | 0.199308  |
| Ptprn2 | Atp6ap1 | sp O54715 VAS1_RAT;tr Q6IRF8 Q6IRF8_RAT                              | 0.201547  |
| Ptprn2 | Tmed9   | sp Q5I0E7 TMED9_RAT                                                  | 0.208727  |
| Ptprn2 | Cpe     | tr D4A8X4 D4A8X4_RAT;sp P15087 CBPE_RAT                              | 0.213242  |
| Ptprn2 | Pcsk1   | tr A0A0G2JX54 A0A0G2JX54_RAT;sp P28840 NEC1_RAT                      | 0.242089  |
| Ptprn2 | Fam3a   | tr B5DFJ2 B5DFJ2_RAT                                                 | 0.243979  |
| Ptprn2 | Enpp2   | sp Q64610 ENPP2_RAT;tr F1LSF4 F1LSF4_RAT;tr D3ZES5 D3ZES5_RAT        | 0.251439  |
| Ptprn2 | Fam3c   | tr A0A0G2JUB0 A0A0G2JUB0_RAT;sp Q810F4 FAM3C_RAT                     | 0.260851  |
| Scg5   | Cpd     | tr F1LPC6 F1LPC6_RAT;sp Q9JHW1 CBPD_RAT;tr A0A0G2JY30 A0A0G2JY30_RAT | 0.101218  |
| Scg5   | Glg1    | sp Q62638 GSLG1_RAT;tr G3V8G5 G3V8G5_RAT                             | 0.11014   |
| Scg5   | Pcsk2   | sp P28841 NEC2_RAT                                                   | 0.16188   |
| Scg5   | Qsox2   | tr D3ZP13 D3ZP13_RAT                                                 | 0.179803  |
| Scg5   | Ndst1   | sp Q02353 NDST1_RAT                                                  | 0.197975  |
| Scg5   | Cpe     | tr D4A8X4 D4A8X4_RAT;sp P15087 CBPE_RAT                              | 0.221507  |
| Scg5   | Scfd1   | sp Q62991 SCFD1_RAT                                                  | 0.225001  |
| Scg5   | Arcn1   | sp Q66H80 COPD_RAT                                                   | 0.23407   |
| Scg5   | Ins1    | sp P01322 INS1_RAT                                                   | 0.249787  |
| Scg5   | Enpp2   | sp Q64610 ENPP2_RAT;tr F1LSF4 F1LSF4_RAT;tr D3ZES5 D3ZES5_RAT        | 0.26516   |
| Scg5   | Tm9sf4  | sp Q4KLL4 TM9S4_RAT;tr A0A0G2KA25 A0A0G2KA25_RAT                     | 0.268902  |
| Scg5   | Hm13    | tr D3ZP98 D3ZP98_RAT;tr A0A0G2K1Z9 A0A0G2K1Z9_RAT                    | 0.26983   |
| Scg5   | Tmed4   | tr G3V6N2 G3V6N2_RAT;tr A0A0G2K8M5 A0A0G2K8M5_RAT                    | 0.280409  |
| Scg5   | Cant1   | sp Q8K4Y7 CANT1_RAT                                                  | 0.28343   |
| Scg5   | Erp44   | tr Q5VLR5 Q5VLR5_RAT                                                 | 0.295744  |
| Sytl4  | Fam234b | tr D3ZWJ9 D3ZWJ9_RAT                                                 | 0.0384438 |
| Sytl4  | Vps45   | sp O08700 VPS45_RAT                                                  | 0.0424586 |
| Sytl4  | App     | tr Q6P6Q5 Q6P6Q5_RAT;sp P08592 A4_RAT                                | 0.0812737 |

|       |         |                                                                                                                   |          |
|-------|---------|-------------------------------------------------------------------------------------------------------------------|----------|
| Sytl4 | Tspan13 | sp Q5FVL6 TSN13_RAT                                                                                               | 0.103997 |
| Sytl4 | St3gal1 | tr E9PSJ1 E9PSJ1_RAT                                                                                              | 0.107136 |
| Sytl4 | Tm9sf3  | tr D3ZUD8 D3ZUD8_RAT                                                                                              | 0.108053 |
| Sytl4 | Sec24d  | tr G3V9S9 G3V9S9_RAT                                                                                              | 0.111641 |
| Sytl4 | Lnpep   | sp P97629 LCAP_RAT;tr A0A0H2UHK5 A0A0H2UHK5_RAT;<br>tr A0A0G2JUW8 A0A0G2JUW8_RAT;tr A0A0G2JYN3 A0A0<br>G2JYN3_RAT | 0.115862 |
| Sytl4 | Atp6v1h | tr A0A0G2K9J2 A0A0G2K9J2_RAT;tr E9PTI1 E9PTI1_RAT                                                                 | 0.129631 |
| Sytl4 | Vamp3   | sp P63025 VAMP3_RAT                                                                                               | 0.154318 |
| Sytl4 | Tfrc    | tr G3V679 G3V679_RAT;sp Q99376 TFR1_RAT                                                                           | 0.155107 |
| Sytl4 | Ncstn   | tr B3DM90 B3DM90_RAT;sp Q8CGU6 NICA_RAT                                                                           | 0.155809 |
| Sytl4 | Cant1   | sp Q8K4Y7 CANT1_RAT                                                                                               | 0.164371 |
| Sytl4 | Tm9sf4  | sp Q4KLL4 TM9S4_RAT;tr A0A0G2KA25 A0A0G2KA25_<br>RAT                                                              | 0.164508 |
| Sytl4 | Napa    | sp P54921 SNAA_RAT                                                                                                | 0.174195 |
| Sytl4 | Atp6v0c | sp P63081 VATL_RAT                                                                                                | 0.174539 |
| Sytl4 | Tm9sf2  | sp Q66HG5 TM9S2_RAT                                                                                               | 0.179875 |
| Sytl4 | Nsf     | tr F1LQ81 F1LQ81_RAT;sp Q9QUL6 NSF_RAT;<br>tr A0A0G2K6U1 A0A0G2K6U1_RAT                                           | 0.19556  |
| Sytl4 | Slc12a9 | tr M0RAK3 M0RAK3_RAT;tr M0R3V5 M0R3V5_RAT;tr A0A<br>096MJB7 A0A096MJB7_RAT;sp Q66HR0 S12A9_RAT                    | 0.197675 |

**Table S2** The list of 81 ISG candidates including their protein names, annotations by the previous studies, and sub-localization based on Uniprot database

| Target  | Names                                                                     | Schwartz <i>et al.</i> 2012 | Brunner <i>et al.</i> 2007 | Hickey <i>et al.</i> 2009 | Localization           |
|---------|---------------------------------------------------------------------------|-----------------------------|----------------------------|---------------------------|------------------------|
| Chga    | Chromogranin-A                                                            | X                           | X                          | X                         | Intravesicular protein |
| Cpe     | Carboxypeptidase E                                                        | X                           | X                          | X                         | Intravesicular protein |
| Ins1    | Insulin-1                                                                 | X                           | X                          | X                         | Intravesicular protein |
| Ins2    | Insulin-2                                                                 | X                           | X                          | X                         | Intravesicular protein |
| Enpp2   | Ectonucleotide pyrophosphatase/<br>phosphodiesterase family<br>member 2   | X                           | X                          |                           | Intravesicular protein |
| Fn1     | Fibronectin                                                               | X                           | X                          |                           | Intravesicular protein |
| Gc      | Group specific component                                                  | X                           | X                          |                           | Intravesicular protein |
| Stc1    | Stanniocalcin-1                                                           | X                           | X                          |                           | Intravesicular protein |
| Plod3   | Procollagen-lysine,2-oxoglutarate<br>5-dioxygenase 3                      | X                           | X                          |                           | Membrane protein       |
| Ptprn2  | Receptor-type tyrosine-protein<br>phosphatase N2                          | X                           | X                          |                           | Membrane protein       |
| Vamp3   | Vesicle-associated Membrane<br>protein 3                                  | X                           | X                          |                           | Membrane protein       |
| Gcg     | Glucagon                                                                  | X                           |                            |                           | Intravesicular protein |
| Pcsk1   | Neuroendocrine convertase 1                                               | X                           |                            |                           | Intravesicular protein |
| Qsox2   | Sulfhydryl oxidase                                                        | X                           |                            |                           | Intravesicular protein |
| Atp6ap1 | V-type proton ATPase subunit S1                                           | X                           |                            |                           | Membrane protein       |
| Arcn1   | Coatomer subunit delta                                                    | X                           |                            |                           | Intravesicular protein |
| St3gal1 | Protein St3gal1                                                           | X                           |                            |                           | Membrane protein       |
| Cnp     | 2',3'-cyclic-nucleotide<br>3'-phosphodiesterase                           | X                           |                            |                           | Intravesicular protein |
| Lamp1   | Lysosome-associated Membrane<br>glycoprotein 1                            | X                           |                            |                           | Lysosome               |
| Nsf     | N-ethylmaleimide sensitive<br>fusion protein, isoform CRA_b               | X                           |                            |                           | Cytoplasm              |
| B3gat3  | Galactosylgalactosylxylosyl<br>protein 3-beta-<br>glucuronosyltransferase | X                           |                            |                           | Membrane protein       |
| Rps27   | 40S ribosomal protein S27                                                 | X                           |                            |                           | Other                  |
| Rab11a  | Ras-related protein Rab-11A                                               | X                           |                            |                           | Membrane protein       |

|         |                                                           |   |   |   |                                                  |
|---------|-----------------------------------------------------------|---|---|---|--------------------------------------------------|
| Slc12a9 | Solute carrier family 12 member 9                         | X |   |   | Membrane protein                                 |
| Cpd     | Carboxypeptidase D                                        | X |   |   | Membrane protein                                 |
| Tfrc    | Transferrin receptor protein 1                            | X |   |   | Membrane protein                                 |
| App     | Amyloid beta A4 protein                                   | X |   |   | Membrane protein/<br>Membrane-associated protein |
| Tmed9   | TransMembrane emp24 domain-containing protein 9           | X |   |   | Membrane-associated protein                      |
| Tmed10  | TransMembrane emp24 domain-containing protein 10          |   |   | X | Membrane-associated protein                      |
| Atp6v1h | Protein Atp6v1h                                           |   | X |   | Membrane protein                                 |
| Cpn1    | Carboxypeptidase N catalytic chain                        |   | X |   | Intravesicular protein                           |
| Glb1l2  | Beta-galactosidase                                        |   | X |   | Intravesicular protein                           |
| Pcsk2   | Neuroendocrine convertase 2                               |   | X |   | Intravesicular protein                           |
| Scg5    | Neuroendocrine protein 7B2                                |   | X |   | Intravesicular protein                           |
| Syt14   | Synaptotagmin-like protein 4                              |   | X |   | Membrane protein                                 |
| Rab37   | Protein Rab37                                             |   | X |   | Membrane protein/<br>Membrane-associated protein |
| Ap2a1   | Adaptor protein complex AP-2, alpha 1 subunit (Predicted) |   |   |   | Membrane protein                                 |
| Arfrp1  | ADP-ribosylation factor-related protein 1                 |   |   |   | Membrane-associated protein                      |
| Atp6v0c | V-type proton ATPase 16 kDa proteolipid subunit           |   |   |   | Membrane protein                                 |
| B4galt3 | Beta-1,4-galactosyltransferase 3                          |   |   |   | Membrane-associated protein                      |
| Cant1   | Soluble calcium-activated nucleotidase 1                  |   |   |   | Membrane-associated protein                      |
| Casc4   | Protein Casc4                                             |   |   |   | Membrane protein                                 |
| Clint1  | Protein Clint1                                            |   |   |   | Membrane-associated protein                      |
| Copb1   | Coatomer subunit beta                                     |   |   |   | Intravesicular protein                           |
| Copg1   | Coatomer subunit gamma-1                                  |   |   |   | Intravesicular protein                           |
| Erp44   | BWK4                                                      |   |   |   | ER                                               |

|         |                                                                      |  |  |  |                             |
|---------|----------------------------------------------------------------------|--|--|--|-----------------------------|
| Fam234b | Protein Fam234b                                                      |  |  |  | Other                       |
| Fam3a   | Fam3a protein                                                        |  |  |  | Membrane-associated protein |
| Fam3c   | Protein FAM3C                                                        |  |  |  | Membrane-associated protein |
| Galnt14 | Polypeptide N-acetylgalactosaminyltransferase                        |  |  |  | Membrane-associated protein |
| Galnt2  | Polypeptide N-acetylgalactosaminyltransferase                        |  |  |  | Membrane-associated protein |
| Glg1    | Golgi apparatus protein 1                                            |  |  |  | Membrane-associated protein |
| Glt8d1  | Da2-24                                                               |  |  |  | Membrane protein            |
| Gosr1   | Golgi SNAP receptor complex member 1                                 |  |  |  | Membrane protein            |
| Hapln4  | Hyaluronan and proteoglycan link protein 4 (Predicted)               |  |  |  | Membrane-associated protein |
| Hm13    | Histocompatibility 13 (Predicted), isoform CRA_a                     |  |  |  | Membrane protein            |
| Hs2st1  | Heparan sulfate 2-O-sulfotransferase 1, isoform CRA_a                |  |  |  | Membrane protein            |
| Impad1  | Ac2-190                                                              |  |  |  | Membrane protein            |
| Lamtor3 | Ragulator complex protein LAMTOR3                                    |  |  |  | Membrane-associated protein |
| Lnpep   | Leucyl-cystinyl aminopeptidase                                       |  |  |  | Membrane protein            |
| Man1b1  | Endoplasmic reticulum mannosyl-oligosaccharide 1,2-alpha-mannosidase |  |  |  | ER                          |
| Napa    | Alpha-soluble NSF attachment protein                                 |  |  |  | Membrane protein            |
| Ncstn   | Ncstn protein                                                        |  |  |  | Membrane protein            |
| Ndst1   | Bifunctional heparan sulfate N-deacetylase/ N-sulfotransferase 1     |  |  |  | Membrane-associated protein |
| Scfd1   | Sec1 family domain-containing protein 1                              |  |  |  | Membrane-associated protein |
| Sec24d  | Protein Sec24d                                                       |  |  |  | Membrane protein            |
| Stamp   | STAM-binding protein                                                 |  |  |  | Membrane protein            |
| Stx12   | Syntaxin-12                                                          |  |  |  | Membrane-associated protein |



|         |                                                 |  |  |  |                                                  |
|---------|-------------------------------------------------|--|--|--|--------------------------------------------------|
| Stx5    | Syntaxin-5                                      |  |  |  | Membrane-associated protein                      |
| Tll1    | Metalloendopeptidase                            |  |  |  | Other                                            |
| Tm9sf2  | TransMembrane 9 superfamily member 2            |  |  |  | Membrane protein                                 |
| Tm9sf3  | TransMembrane 9 superfamily member              |  |  |  | Membrane protein                                 |
| Tm9sf4  | TransMembrane 9 superfamily member 4            |  |  |  | Membrane protein                                 |
| Tmed1   | TransMembrane emp24 domain-containing protein 1 |  |  |  | Membrane-associated protein                      |
| Tmed4   | Protein Tmed4                                   |  |  |  | Membrane-associated protein                      |
| Tmed7   | TransMembrane emp24 domain-containing protein 7 |  |  |  | Membrane-associated protein                      |
| Tmem30a | Cell cycle control protein 50A                  |  |  |  | Membrane protein                                 |
| Tmem63b | Protein Tmem63b                                 |  |  |  | Membrane protein                                 |
| Tspan13 | Tetraspanin-13                                  |  |  |  | Membrane protein                                 |
| Vps45   | Vacuolar protein sorting-associated protein 45  |  |  |  | Membrane protein/<br>Membrane-associated protein |
| Zfp11   | Protein Zfp11                                   |  |  |  | Membrane protein/<br>Membrane-associated protein |

“X” indicates that the candidate is reported in the literatures.
